# Supplementary material for: Human Cytomegalovirus-Encoded G Protein-Coupled Receptor UL33 Facilitates Virus Dissemination via the Extracellular and Cell-to-Cell Route
Source: MDPI journal article supplement (doi:10.3390/v12060594), 2020-05-30
Supplement: s1 [file s1]

## Supplementary Figures

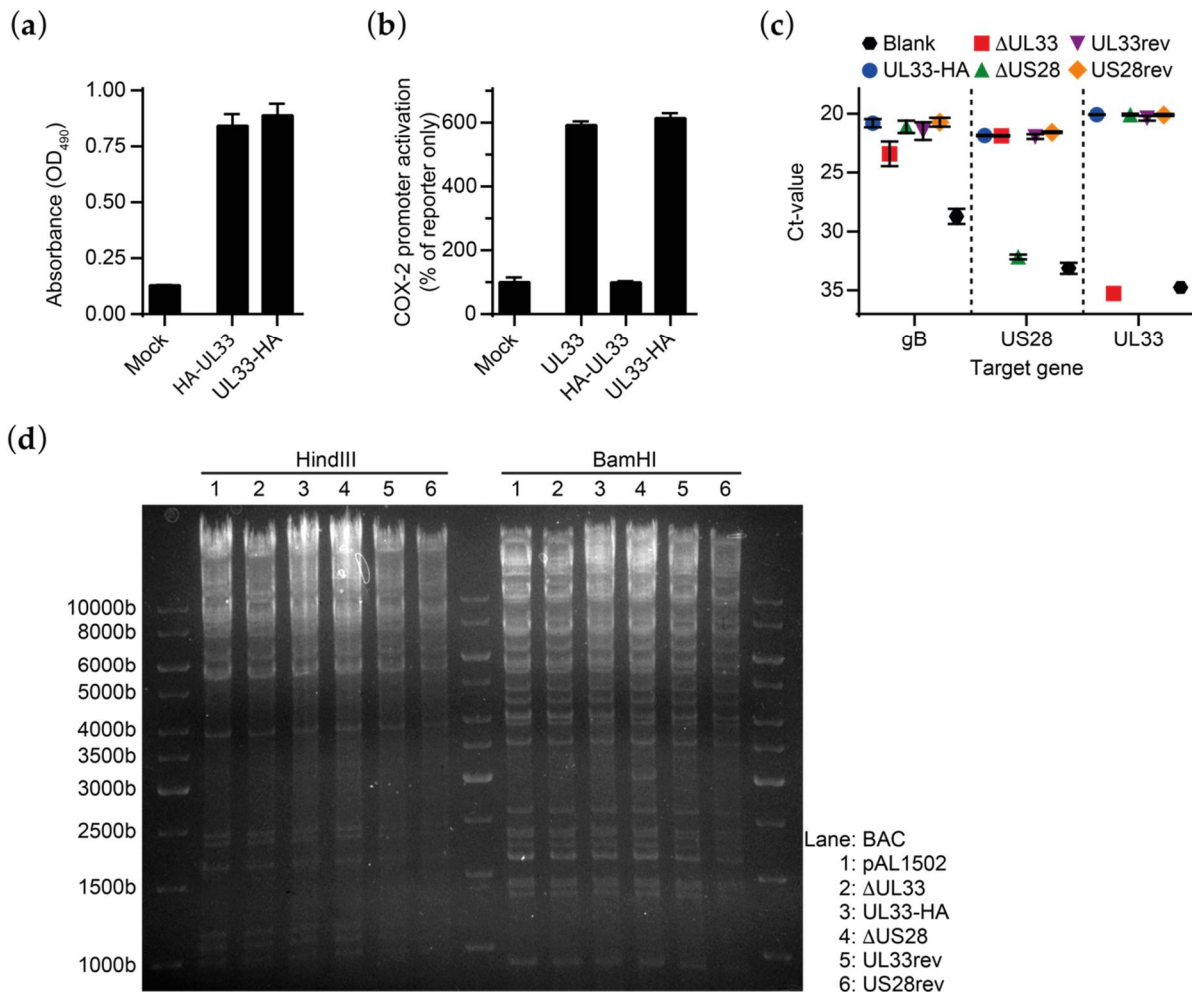

**Figure S1.** Validation of recombineering strategy and genomic integrity of HCMV Merlin BAC variants. Functionality check of N- or C-terminally HA-tagged UL33 receptors. HEK293T cells were transfected with receptor DNA and/or COX-2 promoter-driven reporter gene. The next day, receptor expression (a) and receptor signaling (b) were determined. Quality control of HCMV Merlin BAC derivatives as assessed by qRT-PCR of US28 and UL33 genes (c) and HindIII and BamHI endonuclease digestion pattern analysis (d).

| Strain    | UL33 receptor amino acid sequence                                                                                   | Residue |
|-----------|---------------------------------------------------------------------------------------------------------------------|---------|
| Merlin    | MDTIIHNTNRSTDTPHVNTCNITEPLSAIRTTEAVINTFIIIFVGGPLNAIVLTQLLT                                                          | 60      |
| Towne     | MDTIIHNTNRSTSTPHVNSTCNMTETLSAIRTTEAVINTFIIIFVGGPLNAIVLTQLLT                                                         | 60      |
| Toledo    | MDTIIHNST-RNTTTPHINDTCNMTGPLFAIRTTEAVLNTLIIIFVGGPLNAIVLTQLLT                                                        | 59      |
| TB40/E    | MDTIIHNST-RNNTTPHINDTCNMTGPLFAIRTTEAVLNTFIIIFVGGPLNAIVLTQLLT                                                        | 59      |
| AD169     | MDTIIHNST-RNNTTPHINDTCNMTGPLFAIRTTEAVLNTFIIIFVGGPLNAIVLTQLLT                                                        | 59      |
| FIX/PH/TR | MDTIIHNST-RNNTTPHINDTCNMTGPLFAIRTTEAVLNTFIIIFVGGPLNAIVLTQLLT<br>*****:*..**:***:* * *****:***:*****:*****:*****     | 59      |
| Merlin    | NRVLGYSTPTIYMTNLYSTNFLTTLTVLPFIVLSNQWLLPASVASCFLSVIYYSSCTVGF                                                        | 120     |
| Towne     | NRVLG STPTIYMTNLYSTNFLTTLTVLPFIVLSNQWLLPASVASCFLSVIYYSSCTVGF                                                        | 120     |
| Toledo    | NRVLGYSTPTIYMTNLYSTNFLTTLTVLPFIVLSNQWLLPAGVASCKFLSVIYYSSCTVGF                                                       | 119     |
| TB40/E    | NRVLGYSTPTIYMTNLYSTNFLTTLTVLPFIVLSNQWLLPAGVASCKFLSVIYYSSCTVGF                                                       | 119     |
| AD169     | NRVLGYSTPTIYMTNLYSTNFLTTLTVLPFIVLSNQWLLPAGVASCKFLSVIYYSSCTVGF                                                       | 119     |
| FIX/PH/TR | NRVLGYSTPTIYMTNLYSTNFLTTLTVLPFIVLSNQWLLPAGVASCKFLSVIYYSSCTVGF<br>*****:*****:*****:*****:*****                      | 119     |
| Merlin    | ATVALIAADRYRVLHKRTYARQSYRSTYIILLTWFAGLIFSPAAVYTTVVTHNGTNG-                                                          | 179     |
| Towne     | ATVALIAADRYRVLHKRTYARQSYRSTYIILLTWFAGLIFSPAAVYTTVVTHNGTDE-                                                          | 179     |
| Toledo    | ATVALIAADRYRVLHKRIYARQSYRSTYIILLTWLAGLIFSPAAVYTTVVMHHEANDT                                                          | 179     |
| TB40/E    | ATVALIAADRYRVLHKRTYARQSYRSTYIILLTWLAGLIFSPAAVYTTVVMHHDANDT                                                          | 179     |
| AD169     | ATVALIAADRYRVLHKRTYARQSYRSTYIILLTWLAGLIFSPAAVYTTVVMHHDANDT                                                          | 179     |
| FIX/PH/TR | ATVALIAADRYRVLHKRTYARQSYRSTYIILLTWLAGLIFSPAAVYTTVVMHHDANDT<br>*****:*****:*****:*****:*****:*****:*****:*****:***** | 179     |
| Merlin    | QSSNGHATCVLYFIADEVYTVLLSWKVLLTLVWGAAPVIMMTWFYAFFYSTVQRASQKQR                                                        | 239     |
| Towne     | -NTNGHATCVLYFIADEVYTVLLSWKVLLTLVWGAAPVIMMTWFYAFFYSTVQRASQKQR                                                        | 238     |
| Toledo    | TNATGHATCVLYFVADEVHTVLLSWKVLLTLVWGAAPVIMMTWFYAFFYSTVQRASQKQR                                                        | 239     |
| TB40/E    | NNTNGHATCVLYFVAEEVHTVLLSWKVLLTLVWGAAPVIMMTWFYAFFYSTVQRASQKQR                                                        | 239     |
| AD169     | NNTNGHATCVLYFVAEEVHTVLLSWKVLLTLVWGAAPVIMMTWFYAFFYSTVQRASQKQR                                                        | 239     |
| FIX/PH/TR | NNTNGHATCVLYFVAEEVHTVLLSWKVLLTLVWGAAPVIMMTWFYAFFYSTVQRASQKQR<br>.:*****:***:*****:*****:*****:*****:*****:*****     | 239     |
| Merlin    | SRTLTFVSVLLISFVALQTPYVSLIMFNSYATAAWPMDCEHLTLRRTIGTLSRLVPHLHC                                                        | 299     |
| Towne     | SRTLTFVSVLLISFVALQTPYVSLIMFNSYATAAWPMDCEHLTLRRTIGTLSRLVPHLHC                                                        | 298     |
| Toledo    | SRTLTFVSVLLISFVALQTPYISLMIFNSYATTAWSTKCEHLTLRRTIGTLARLVPHLHC                                                        | 299     |
| TB40/E    | SRTLTFVSVLLISFVALQTPYVSLIMFNSYATTAWPMQCEHLTLRRTIGTLARLVPHLHC                                                        | 299     |
| AD169     | SRTLTFVSVLLISFVALQTPYVSLIMFNSYATTAWPMQCEHLTLRRTIGTLARLVPHLHC                                                        | 299     |
| FIX/PH/TR | SRTLTFVSVLLISFVALQTPYVSLIMFNSYATTAWPMQCEHLTLRRTIGTLARLVPHLHC<br>*****:*****:*****:*****:*****:*****:*****:*****     | 299     |
| Merlin    | LINPILYALLGHDFLQMRQCFRGQLDRAFLRSQQNQQRATAETNLAAGNNSQSVATSLS                                                         | 359     |
| Towne     | LINPILYALLGHDFLQMRQCFRGQLDRAFLRSQQNQQRATAETNLAAGNNSQSVATSLS                                                         | 358     |
| Toledo    | LINPILYALLGHDFLQMRQCFRGQLDRAFLRSQQNQQRATAETNLAAGNNSQSVATSLS                                                         | 359     |
| TB40/E    | LINPILYALLGHDFLQMRQCFRGQLDRAFLRSQQNQQRATAETNLAAGNNSQSVATSLS                                                         | 359     |
| AD169     | LINPILYALLGHDFLQMRQCFRGQLDRAFLRSQQNQQRATAETNLAAGNNSQSVATSLS                                                         | 359     |
| FIX/PH/TR | LINPILYALLGHDFLQMRQCFRGQLDRAFLRSQQNQQRATAETNLAAGNNSQSVATSLS<br>*****:*****:*****:*****:*****:*****:*****:*****      | 359     |
| Merlin    | DTSSKNCNQHAKRSVSFNFPSTGWTGGQKTASNDTSTKIPHRLSQSHHNLSGV                                                               | 412     |
| Towne     | DTNSKNCNQHAKRSVSFNFPSTGWTGGQKTASNDTSTKIPHRLSQSHHNLSGV                                                               | 411     |
| Toledo    | DNPSKNCNQHAKRSVSFNFPSTGWTGGQKTASNDTSTKIPHRLSQSHHNLSGV                                                               | 412     |
| TB40/E    | DTNSKNCNQHAKRSVSFNFPSTGWTGGQKTASNDTSTKIPHRLSQSHHNLSGV                                                               | 412     |
| AD169     | DTNSKNYNQHAKRSVSFNFPSTGWTGGQKTASNDTSTKIPHRLSQSHHNLSGV                                                               | 412     |
| FIX/PH/TR | DNPSKNCNQHAKRSVSFNFPSTGWTGGQKTASNDTSTKIPHRLSQSHHNLSGV<br>*..*** *****:*****:*****:*****:*****:*****:*****           | 412     |

**Figure S2.** Multiple sequence alignment of HCMV UL33 orthologs. Sequence variability is highlighted in yellow. (\*) fully conserved residue; (:) conservation between groups of strongly similar properties; (.) conservation between groups of weakly similar properties.
